# Supplementary material
Source: ML conference proceedings conference paper supplement (https://openreview.net/forum?id=aYuZO9DIdnn)
Supplement: supplementary_material [file attachment]

## A MAHANALOBIS DISTANCE AND WHITENING

The Mahalanobis distance (Chandra et al., 1936; McLachlan, 1999) between two samples  $x$  and  $x'$  drawn from a random vector  $X$  with covariance  $\Sigma$  is defined as

$$D_M(x, x') = \sqrt{(x - x')^T \Sigma^{-1} (x - x')}$$

If the random vector  $X$  has identity covariance, it is simply the usual euclidian distance :

$$D_M(x, x') = \|x - x'\|.$$

Using the diagonalization of the covariance matrix,  $\Sigma = P\Lambda P^T$ , the affine whitening operators of the random vector  $\mathbf{X}$  are the operators

$$w : \mathbf{X} \mapsto O\Lambda^{-1/2}P^T(\mathbf{X} - \mu), \quad \forall O \in O_n(\mathbb{R}). \quad (5)$$

For example, the PCA whitening operator is

$$w_{\text{PCA}} : \mathbf{X} \mapsto \Lambda^{-1/2}P^T(\mathbf{X} - \mu)$$

and the ZCA whitening operator is

$$w_{\text{ZCA}} : \mathbf{X} \mapsto P\Lambda^{-1/2}P^T(\mathbf{X} - \mu).$$

For all whitening operator  $w$  we have

$$\|w(x) - w(x')\| = D_M(x, x')$$

since

$$\begin{aligned} \|w(x) - w(x')\| &= \|O\Lambda^{-1/2}P^T(x - x')\| \\ &= \sqrt{(x - x')^T P\Lambda^{-1/2}O^T O\Lambda^{-1/2}P^T(x - x')} \\ &= \sqrt{(x - x')^T P\Lambda^{-1}P^T(x - x')} \\ &= D_M(x, x'). \end{aligned}$$

## B IMPLEMENTATION OF THE PATCHES K-NEAREST-NEIGHBORS ENCODING

In this section, we explicitly write the whitened patches with the whitening operator  $W$ . Recall that we consider the following set of euclidean pairwise distances:

$$\mathcal{C}_{i,x} = \{\|Wp_{i,x} - Wd\| \mid d \in \mathcal{D}\}.$$

For each image patch we encode the  $K$  nearest neighbors of  $Wp_{i,x}$  in the set  $Wd, d \in \mathcal{D}$ , for some  $K \in 1 \dots |\mathcal{D}|$ . We can use the square distance instead of the distance since it doesn't change the  $K$  nearest neighbors. We have

$$\|Wp_{i,x} - Wd\|^2 = \|Wp_{i,x}\|^2 - 2\langle p_{i,x}, W^T Wd \rangle + \|Wd\|^2$$

The term  $\|Wp_{i,x}\|^2$  doesn't affect the  $K$  nearest neighbors, so the  $K$  nearest neighbors are the  $K$  smallest values of

$$\left\{ \frac{\|Wd\|^2}{2} + \langle p_{i,x}, -W^T Wd \rangle, d \in \mathcal{D} \right\}$$

This can be implemented in a convolution of the image using  $-W^T Wd$  as filters and  $\|Wd\|^2/2$  as bias term, followed by a "vectorwise" non-linearity that binary encodes the  $K$  smallest values in the channel dimension. Once this is computed, we can then easily compute

$$\left\{ \frac{\|Wd\|^2}{2} + \langle p_{i,x}, W^T Wd \rangle, d \in \mathcal{D} \right\}$$

which is the quantity needed to compute the  $K$  nearest neighbors in the set of negative patches  $\bar{\mathcal{D}}$ . This is a computationally efficient way of doubling the number of patches while making the representation invariant to negative transform.

## C ABLATION STUDY ON CIFAR-10

For this ablation study on CIFAR-10, the reference experiment uses  $|\mathcal{D}| = 2048$  patches, a patch size  $Q = 6$  a number of neighbors  $K = 0.4 \times 2048 = 820$  and a whitening regularizer  $\lambda = 1e-3$ , and yields 82.5% accuracy. Figure 4 shows the results in high resolution.

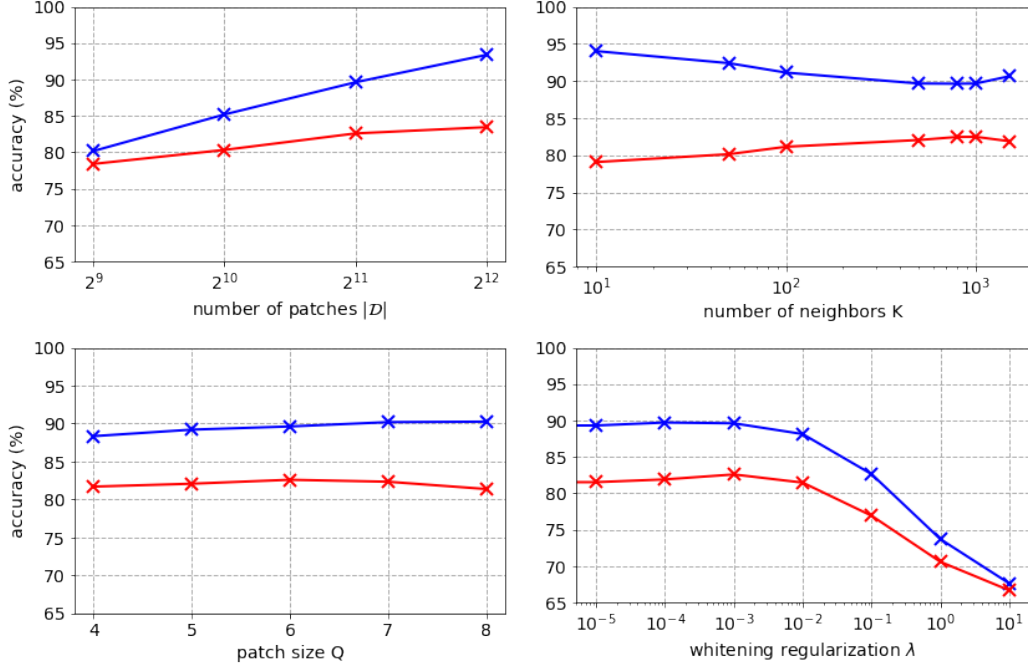

Figure 4: CIFAR-10 ablation experiments, train accuracies in blue, test accuracies in red. Number of patches  $|\mathcal{D}|$  varies in  $\{512, 1024, 2048, 4096\}$ , number of neighbors  $K$  varies in  $\{10, 50, 100, 500, 800, 1000, 1500\}$ , patch size  $Q$  varies in  $\{4, 5, 6, 7, 8\}$ , whitening regularization  $\lambda$  varies in  $\{0, 10^{-5}, 10^{-4}, 10^{-3}, 10^{-2}, 10^{-1}, 1, 10\}$ .

## D INTRINSIC DIMENSION ESTIMATE

The following estimate of the intrinsic dimension  $d_{\text{int}}$  is introduced in [Levina and Bickel \(2004\)](#) as follows

$$d_{\text{int}}(p) = \left( \frac{1}{K-1} \sum_{k=1}^{K-1} \log \frac{\tau_K(p)}{\tau_k(p)} \right)^{-1}, \quad (6)$$

where  $\tau_k(p)$  is the euclidean distance between the patch  $p$  and it's  $k$ -th nearest neighbor int the training set.
